# Supplementary material
Source: publisher site journal article supplement (https://www.dovepress.com/article/511642)

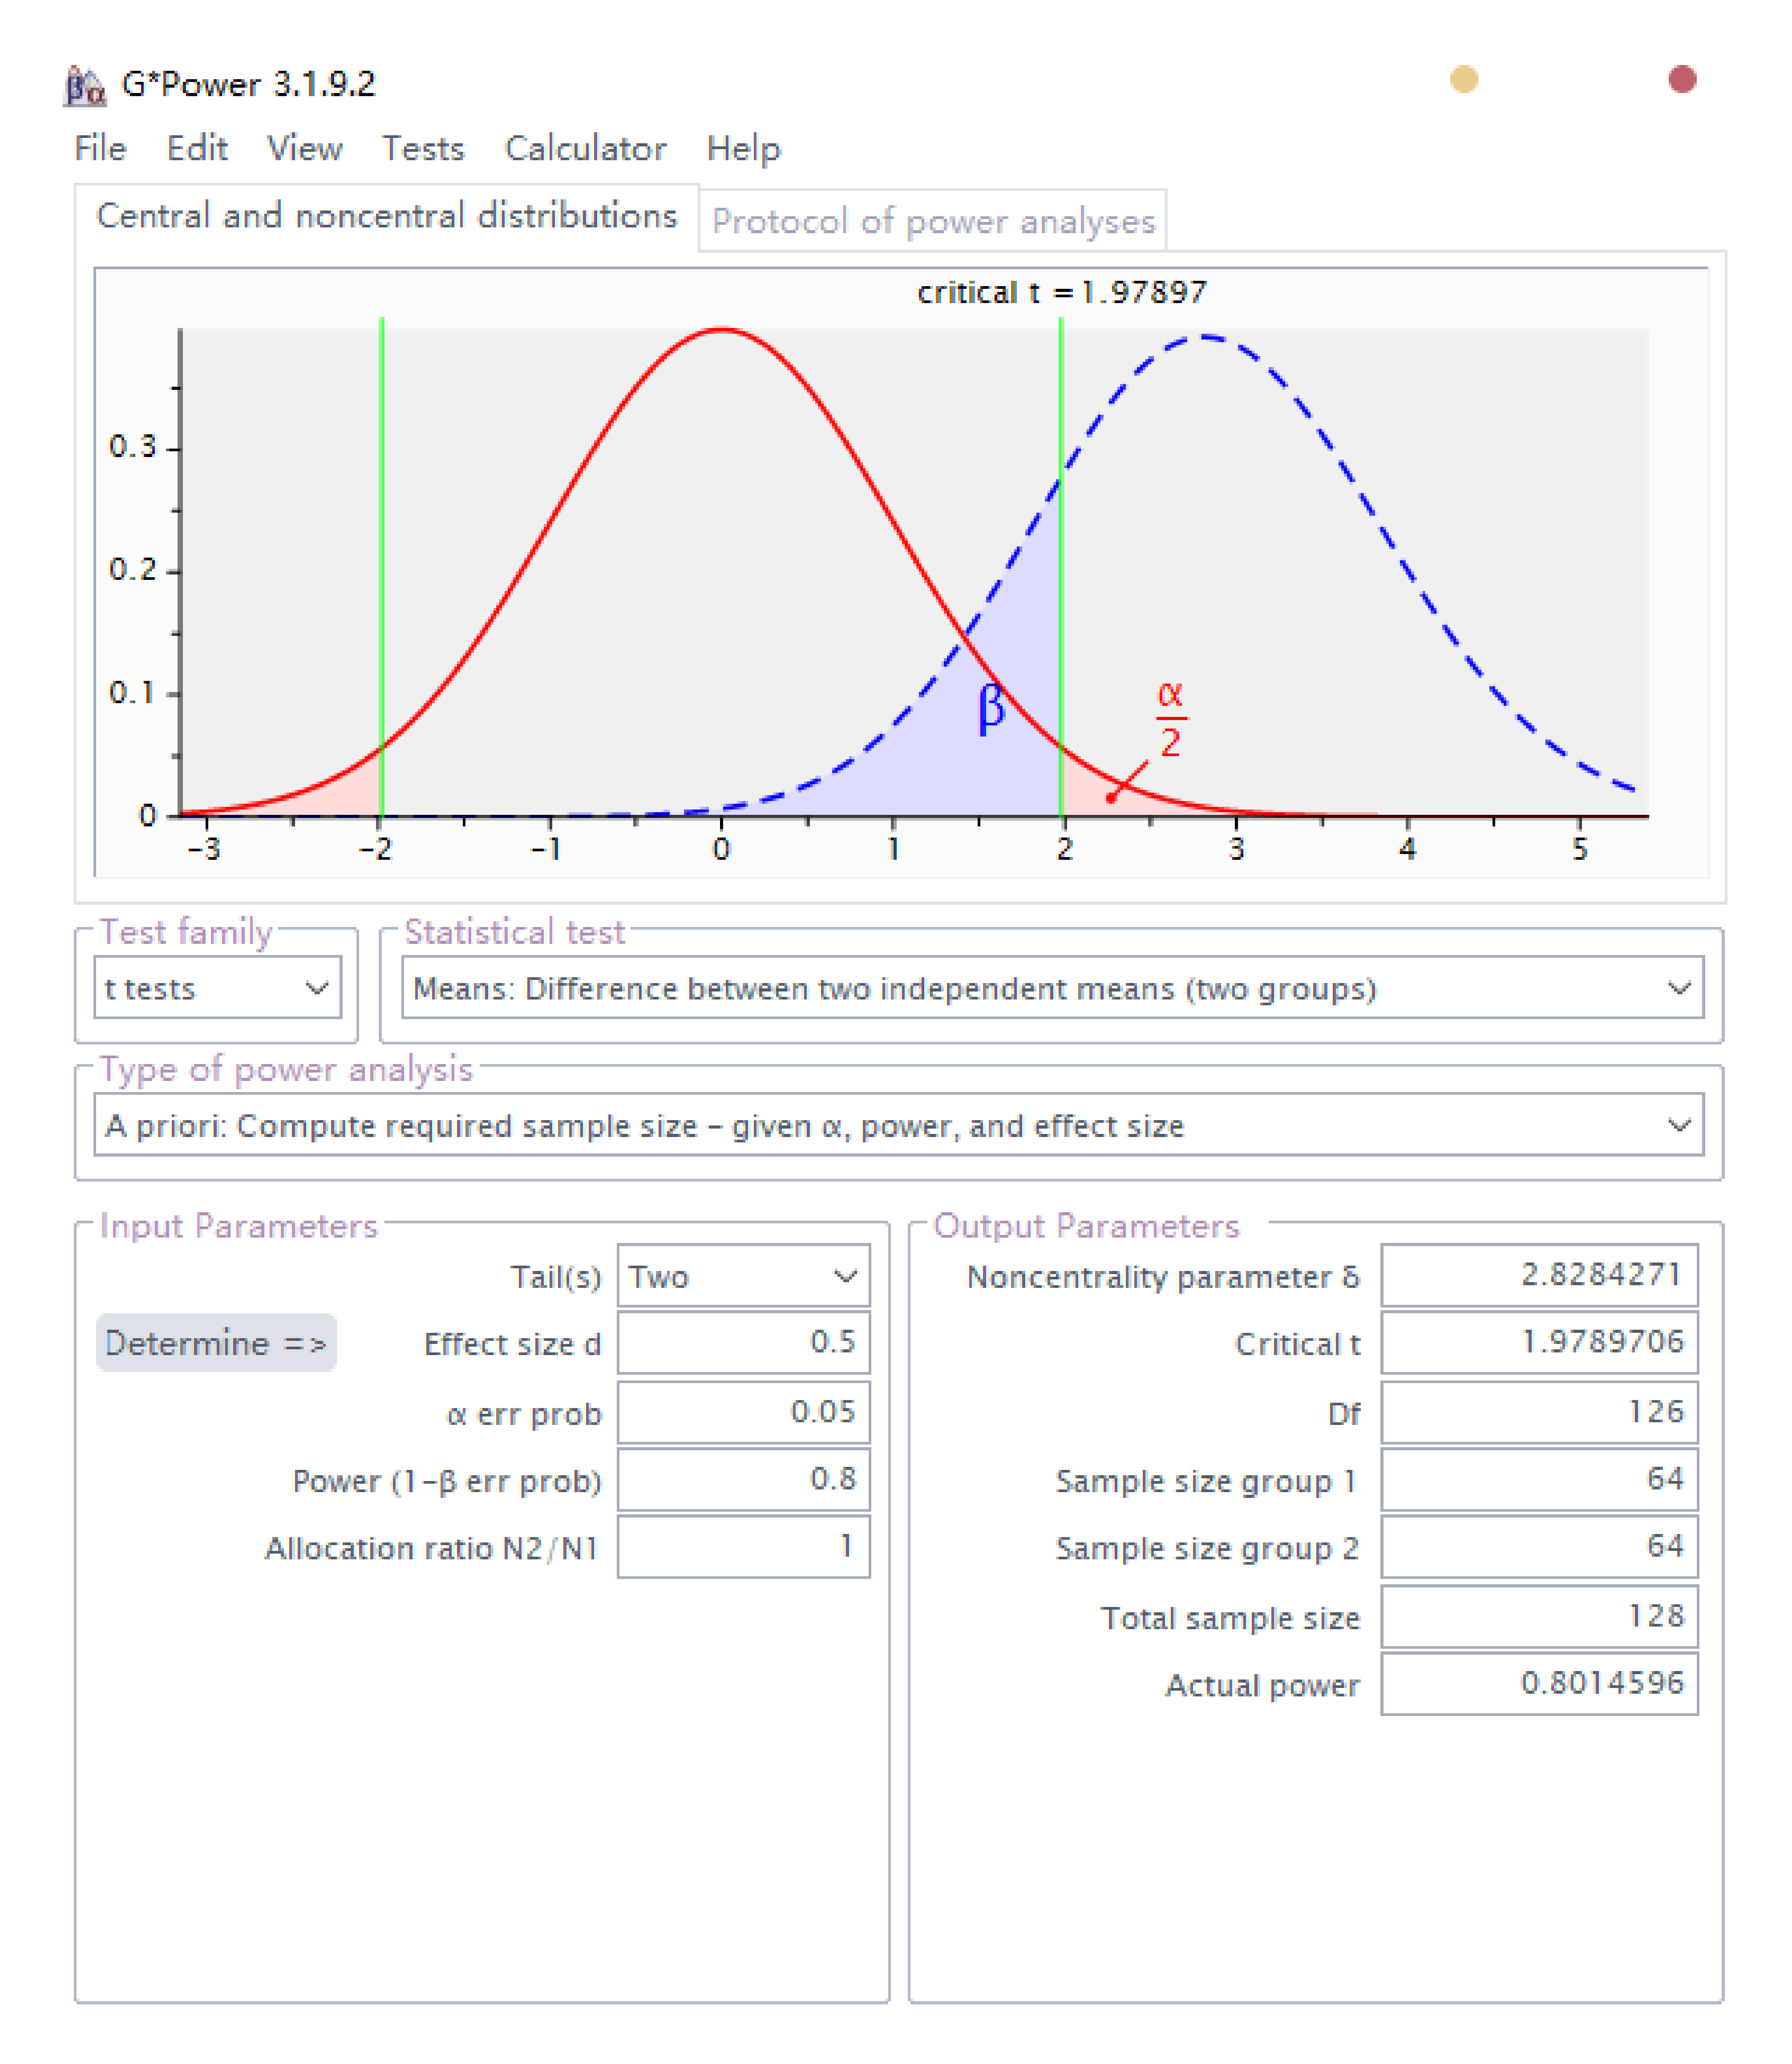


**Supplementary figure 1** Sample size calculation using G*Power 3.1 software.

Supplement: Supplementary file 1 [file Supplemental+figure+1_1.docx]
